# Supplementary material
Source: HighWire-hosted journal article supplement (https://jech.bmj.com/content/73/4/287)
Supplement: inline-supplementary-material-1 [file inline-supplementary-material-1.pdf]

**eTable 1: Diagnostic and procedure codes for clinical conditions included in propensity score model**

| Variable Name               | Prior Event <sup>a</sup>                              | Hospitalization Records <sup>b</sup> |                           | Physicians' Services Claims |                   |
|-----------------------------|-------------------------------------------------------|--------------------------------------|---------------------------|-----------------------------|-------------------|
|                             |                                                       | Diagnostic codes ICD9                | Procedure codes CCP       | Diagnostic codes            | Fee codes         |
| Coronary Artery Disease     | Acute myocardial infarction                           | 410.x                                |                           |                             |                   |
|                             | Percutaneous coronary intervention                    |                                      | 48.02, 48.03, 48.09       |                             |                   |
|                             | Coronary artery bypass graft surgery                  |                                      | 48.11-48.19, 48.2         |                             |                   |
| Cerebrovascular Disease     | Stroke                                                | 431.x, 434.x, 436.x                  |                           |                             |                   |
|                             | Carotid endarterectomy                                |                                      | 50.12                     |                             |                   |
|                             | Transient ischemic attack                             | 435.x                                |                           |                             |                   |
| Peripheral Vascular Disease | Lower extremity bypass surgery                        |                                      | 51.25, 51.29 <sup>d</sup> |                             |                   |
|                             | Lower extremity percutaneous transluminal angioplasty |                                      |                           |                             | J025 <sup>e</sup> |
| Hypertension <sup>c</sup>   | --                                                    | 401.x-405.x                          |                           | 401-405                     |                   |

<sup>a</sup>Based on hospitalization records or physicians' services claims within the 3 year period prior to index (April 1, 1999-March 31, 2002).

<sup>b</sup>The Canadian Institute of Health Information (CIHI) Hospital Discharge Abstract Database used ICD9 coding for diagnoses and Canadian Classification of Procedures (CCP) coding for procedures prior to April 1, 2002.

<sup>c</sup>Any hospitalization with at least one relevant ICD9 code or two physicians' services claims bearing a diagnosis of 401-405 (inclusive) within a 3-year period

<sup>d</sup>Procedure codes not eligible for inclusion if any of the following ICD9 codes were listed within the same hospital record: I67.1, I71, I72, I60, I77.0, I79.0, any Q.code.

<sup>e</sup>Fee code not eligible for inclusion if any of the following diagnostic codes were listed within the same physicians' services claim: 403, 584, 585, 586, 593.8, 435 and 437
