# Supplementary material
Source: HighWire-hosted journal article supplement (https://jech.bmj.com/content/73/4/287)
Supplement: inline-supplementary-material-2 [file inline-supplementary-material-2.pdf]

**eTable 2: Unweighted baseline characteristics of overall study population by neighborhood walkability (N=958,567)**

|                                                       | <b>Low walkability</b> | <b>High walkability</b> | <b>Standardized difference<sup>a</sup></b> |
|-------------------------------------------------------|------------------------|-------------------------|--------------------------------------------|
| <b>Demographics</b>                                   |                        |                         |                                            |
| Mean age, years                                       | 49.0                   | 48.3                    | 0.05                                       |
| Sex (% male)                                          | 47.0                   | 49.8                    | 0.05                                       |
| Less than 10 years in Canada                          | 5.6                    | 6.6                     | 0.04                                       |
| <b>Comorbidities<sup>b</sup></b>                      |                        |                         |                                            |
| Hypertension                                          | 20.1                   | 18.0                    | 0.05                                       |
| Coronary artery disease                               | 0.7                    | 0.6                     | 0.01                                       |
| Cerebrovascular disease                               | 0.2                    | 0.3                     | 0.01                                       |
| Asthma                                                | 7.7                    | 7.8                     | 0.001                                      |
| Psychosocial problems                                 | 36.7                   | 39.1                    | 0.05                                       |
| Chronic medical conditions, unstable                  | 25.1                   | 24.9                    | 0.01                                       |
| Chronic medical conditions, stable                    | 48.8                   | 43.0                    | 0.1                                        |
| <b>Health care utilization</b>                        |                        |                         |                                            |
| No. primary care visits/year                          | 4.8                    | 4.6                     | 0.03                                       |
| No. hospitalizations/year                             | 0.06                   | 0.06                    | 0.01                                       |
| <b>Neighborhood characteristics</b>                   |                        |                         |                                            |
| South Asian                                           | 6.4                    | 3.9                     | 0.3                                        |
| Other non-white ethnic groups                         | 16.6                   | 21.7                    | 0.3                                        |
| Lowest quintile of neighborhood material deprivation  | 48.9                   | 23.0                    | 0.6                                        |
| Highest quintile of neighborhood material deprivation | 3.7                    | 21.8                    | 0.6                                        |
| Lowest quintile of neighborhood dependency            | 33.1                   | 27.1                    | 0.1                                        |
| Highest quintile of neighborhood dependency           | 10.6                   | 11.0                    | 0.01                                       |

All values are % unless stated otherwise

<sup>a</sup> Values >0.1 indicate a meaningful difference

<sup>b</sup> Based on categories created by the John Hopkins Adjusted Clinical Groups (ACG) case-mix system
